# Supplementary material
Source: PubMed Central journal article supplement (PMC2040907)
Supplement: pnas_0704853104_4.pdf [file pnas_0704853104_4.pdf]

**Table 1.** T cell populations in mice with T cell-specific deletion of SHIP\*

|        |        |                                    | SHIP <sup>fl/fl</sup> | CD4creSHIP <sup>fl/fl</sup> |
|--------|--------|------------------------------------|-----------------------|-----------------------------|
| No Tg  | PB     | Thy1.2 <sup>+</sup>                | 35 ± 5                | 28 ± 5                      |
|        |        | CD4/CD8                            | 1.8 ± 0.3             | 1.7 ± 0.4                   |
|        | Spleen | Thy1.2 <sup>+</sup>                | 30 ± 2                | 28 ± 4                      |
|        |        | FoxP3 <sup>+</sup>                 | 19 ± 2                | 21 ± 2                      |
|        |        | CD4 <sup>+</sup> CD69 <sup>+</sup> | 7.5 ± 1               | 9.5 ± 1                     |
|        | Thymus | DN                                 | 4 ± 0.5               | 5 ± 0.5                     |
|        |        | DP                                 | 81 ± 3                | 79 ± 4                      |
|        |        | CD4 SP                             | 12 ± 2                | 13 ± 3                      |
|        |        | CD8 SP                             | 5 ± 2                 | 6 ± 2                       |
|        | OT-I   | PB                                 | Thy1.2 <sup>+</sup>   | 39 ± 1                      |
| Spleen |        | Thy1.2 <sup>+</sup>                | 33 ± 2                | 29 ± 3                      |
| Thymus |        | DN                                 | 6 ± 2                 | 5 ± 3                       |
|        |        | DP                                 | 54 ± 5                | 49 ± 4                      |
|        |        | CD4 SP                             | 6 ± 4                 | 5 ± 5                       |
|        |        | CD8 SP                             | 10 ± 3                | 11 ± 4                      |
| OT-II  | PB     | Thy1.2 <sup>+</sup>                | 30 ± 0.4              | 26 ± 1                      |
|        | Spleen | Thy1.2 <sup>+</sup>                | 31 ± 2                | 30 ± 3                      |
|        | Thymus | DN                                 | 12 ± 2                | 13 ± 3                      |
|        |        | DP                                 | 53 ± 5                | 54 ± 5                      |
|        |        | CD4 SP                             | 31 ± 4                | 33 ± 5                      |
|        |        | CD8 SP                             | 3 ± 1                 | 3 ± 2                       |
|        | 5CC7   | PB                                 | Thy1.2 <sup>+</sup>   | 25 ± 2                      |
| Spleen |        | Thy1.2 <sup>+</sup>                | 13 ± 3                | 12 ± 3                      |
| Thymus |        | DN                                 | 10 ± 2                | 11 ± 2                      |
|        |        | DP                                 | 37 ± 3                | 34 ± 4                      |
|        |        | CD4 SP                             | 46 ± 2                | 51 ± 4                      |
|        |        | CD8 SP                             | 4 ± 1                 | 3.5 ± 1                     |

\*All data in percentages except for CD4/CD8 ratio. Total number of lymphoid cells in thymus, spleen, and lymph nodes were similar in all mice. At least four mice per group.
