# Supplementary material
Source: PubMed Central journal article supplement (PMC2040907)

**A**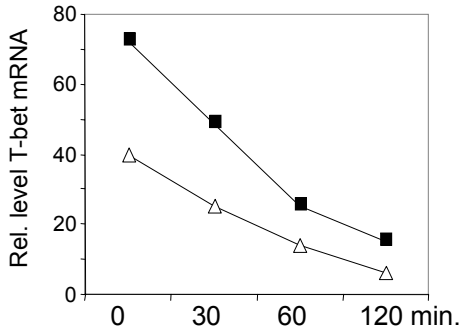**B**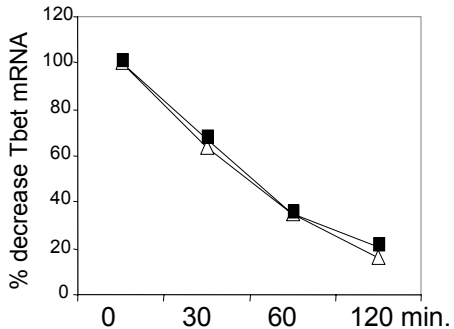

Supplement: pnas_0704853104_3.pdf [file pnas_0704853104_3.pdf]
